# Supplementary material for: From lithotroph- to organotroph-dominant: directional shift of microbial community in sulphidic tailings during phytostabilization
Source: PubMed Central journal article supplement (PMC4534789; doi:10.1038/srep12978), 2015-08-13
Supplement: srep12978-s1.pdf [file srep12978-s1.pdf]

# From lithotroph- to organotroph-dominant: directional shift of microbial community in sulphidic tailings during phytostabilization

Xiaofang Li<sup>1</sup>, Philip L. Bond<sup>2</sup>, Joy D. Van Nostrand<sup>3</sup>, Jizhong Zhou<sup>3,4,5\*</sup> and Longbin Huang<sup>1\*</sup>

<sup>1</sup> *Centre for Mined Land Rehabilitation, Sustainable Minerals Institute, The University of Queensland, QLD 4072, Australia*

<sup>2</sup> *Advanced Water Management Centre, The University of Queensland, QLD 4072, Australia*

<sup>3</sup> *Institute for Environmental Genomics and Department of Microbiology and Plant Biology, University of Oklahoma, Norman, OK 73019*

<sup>4</sup> *Earth Science Division, Lawrence Berkeley National Laboratory, Berkeley, CA, USA 94720*

<sup>5</sup> *State Key Joint Laboratory of Environment Simulation and Pollution Control, School of Environment, Tsinghua University, Beijing 100084, China*

Running title: Microbial communities in sulphidic tailings

Subject Category: Microbial population and community ecology

\*Corresponding authors: [l.huang@uq.edu.au](mailto:l.huang@uq.edu.au); [jzhou@rccc.ou.edu](mailto:jzhou@rccc.ou.edu)

**Supplementary Table 1** Additional information of the treatments sampled in this study

| Treatment name                | Top soil addition                                                    | Plant status                                                                                           | Watering                                      |
|-------------------------------|----------------------------------------------------------------------|--------------------------------------------------------------------------------------------------------|-----------------------------------------------|
| Tailings only                 | No topsoil was added initially                                       | No plants                                                                                              | Salt on surface                               |
| Tailings + plants             | Surfaced with local topsoil (gravelly/siliceous soil) 10-15 cm thick | Surviving plants include 2 x <i>Ptilotus</i> , 3x <i>Acacia chisolmii</i> , 1 x <i>Acacia ligulata</i> | Irrigation                                    |
| Tailings + Woodchips          | No topsoil was added initially                                       | No plants                                                                                              | Salt on surface                               |
| Tailings + Woodchips + plants | No topsoil was added initially                                       | 4 x <i>Ptilotus</i> plants, 2 x <i>Acacia chisolmii</i> plants alive                                   | Drip-irrigation was not uniformly distributed |

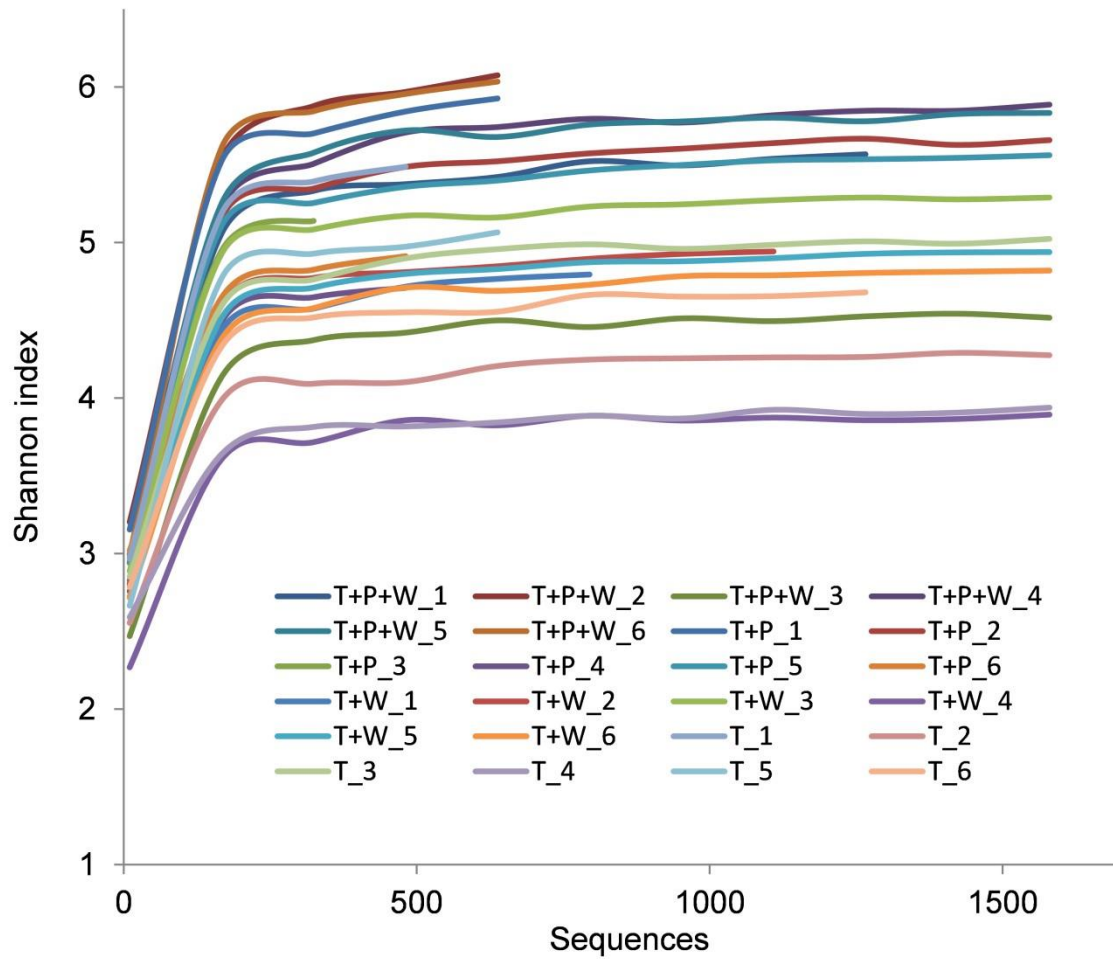

Supplementary Figure 1 Rarefaction curve of OTUs recovered from the Mount Isa Pb-Zn-Cu tailings

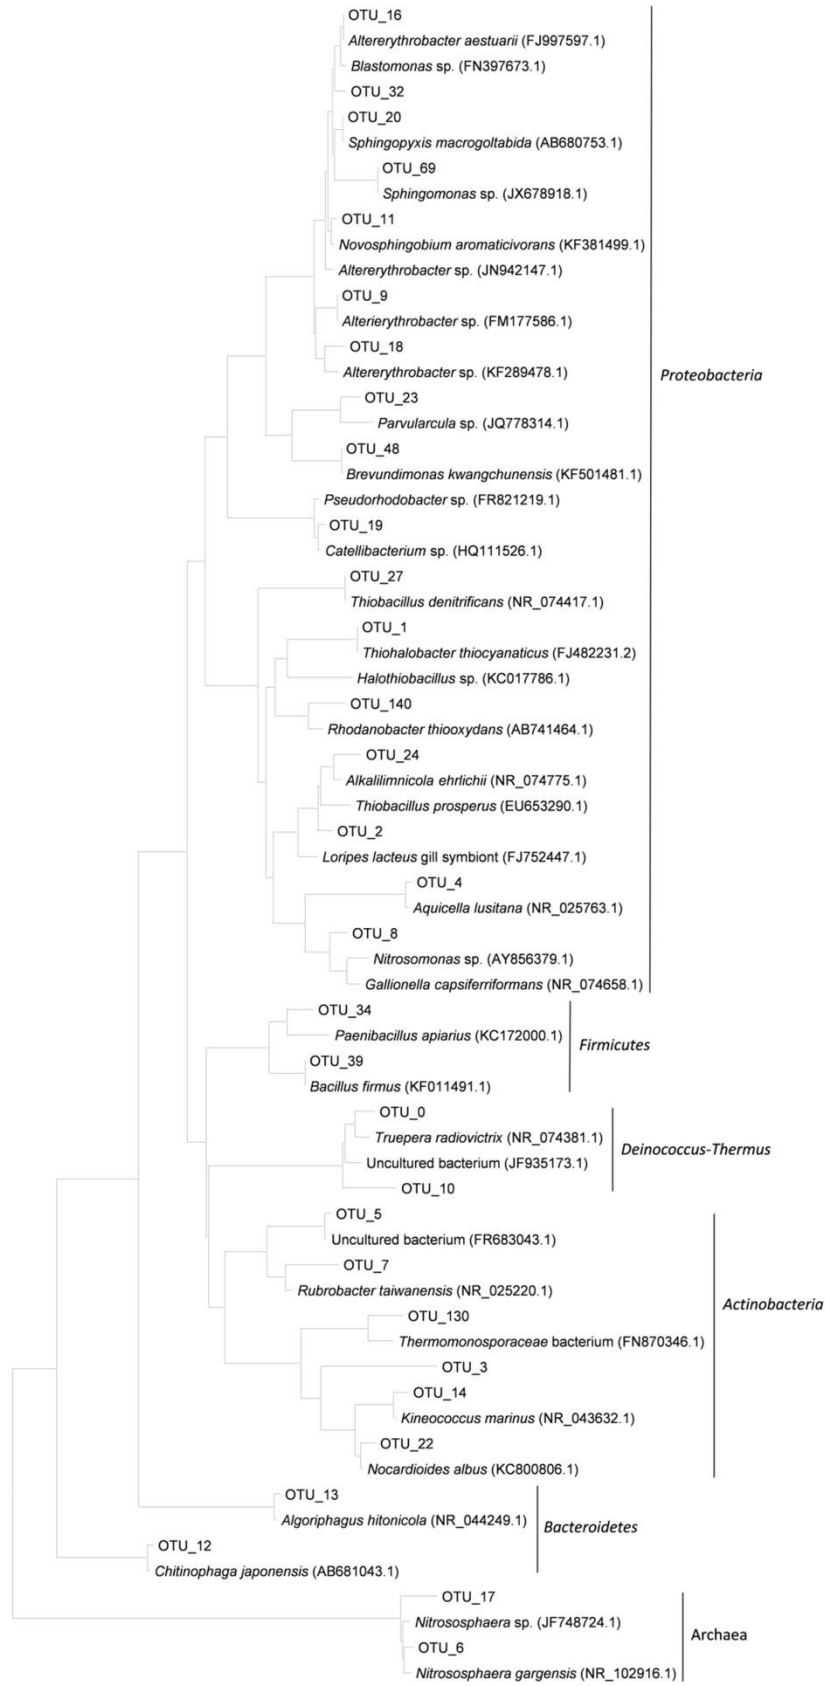

Supplementary Figure 2 A phylogenetic tree of 16S rRNA gene sequences recovered from the 24 tailings samples in this study. The tree was constructed using the neighbour-joining method. Only representative OTUs were shown in this tree. The taxonomic groups are delineated on the right. Scale bar stands for 0.05 changes per site



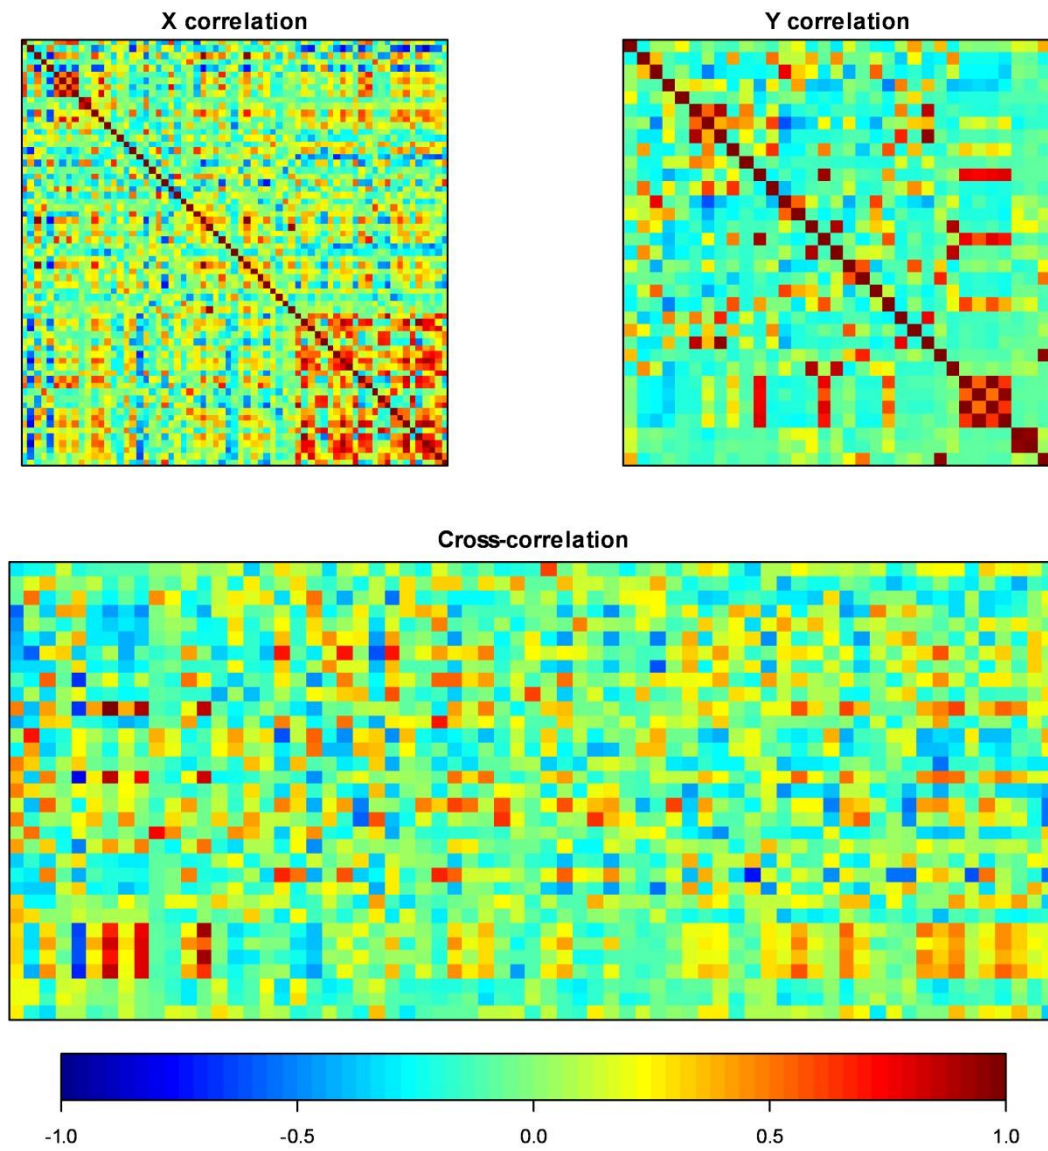

Supplementary Figure 4 Correlation matrices for: Environmental variables (upper-left,  $67 \times 67$ ), biological variables (upper-right,  $33 \times 33$ ), cross-correlation Environmental \_ biological variables (bottom). Increasing values are translated into colours from blue (negative correlation) to red (positive correlation)

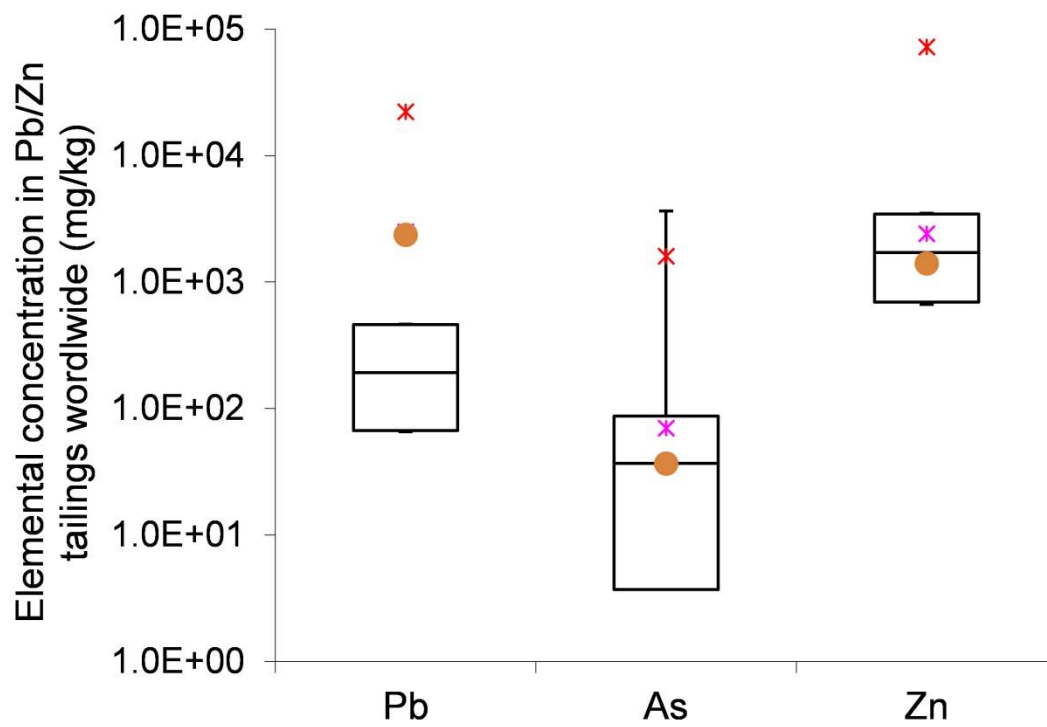

Supplementary Figure 5 Abundance of prominent toxic elements (Pb, n = 52; As, n = 38; Zn, n = 54) in Pb-Zn mine tailings from worldwide. Data was from a Tailings Property Database constructed by our group (available for free upon request)
